# Supplementary material for: Nanopore-based single molecule sequencing of the D4Z4 array responsible for facioscapulohumeral muscular dystrophy
Source: PubMed Central journal article supplement (PMC5665936; doi:10.1038/s41598-017-13712-6), 2017-11-01
Supplement: 41598_2017_13712_MOESM1_ESM.pdf [file 41598_2017_13712_MOESM1_ESM.pdf]

**Nanopore-based single molecule sequencing of the D4Z4 array  
responsible for facioscapulohumeral muscular dystrophy**

Satomi Mitsuhashi<sup>1,2</sup>, So Nakagawa<sup>1,3</sup>, Mahoko Takahashi Ueda<sup>1,3</sup>, Tadashi  
Imanishi<sup>1</sup>, Martin C Frith<sup>4-6</sup>, Hiroaki Mitsuhashi<sup>7</sup>

1. Biomedical Informatics Laboratory, Department of Molecular Life Science,  
Tokai University School of Medicine, Isehara, Kanagawa 259-1193, Japan
2. Department of Human Genetics, Yokohama City University Graduate School  
of Medicine, Yokohama, Kanagawa 236-0004, Japan
3. Micro/Nano Technology Center, Tokai University, Hiratsuka, Kanagawa,  
259-1291, Japan
4. Artificial Intelligence Research Center, National Institute of Advanced  
Industrial Science and Technology (AIST), Tokyo, 135-0064, Japan
5. Graduate School of Frontier Sciences, University of Tokyo, Chiba,  
277-8562, Japan

6. Computational Bio Big-Data Open Innovation Laboratory (CBBB-OIL),  
National Institute of Advanced Industrial Science and Technology (AIST),  
Tokyo, 169-8555, Japan
7. Department of Applied Biochemistry, School of Engineering, Tokai  
University, Hiratsuka, Kanagawa, 259-1291, Japan

**Corresponding author**

Satomi Mitsuhashi

Department of Human Genetics Yokohama City University Graduate School of  
Medicine, Yokohama, Kanagawa 236-0004, Japan

Tel. +81-45-787-2606

Fax. +81-45-786-5219

E-mail: [satomits@yokohama-cu.ac.jp](mailto:satomits@yokohama-cu.ac.jp)

# Supplemental Figure 1

## *The last D4Z4 repeat*

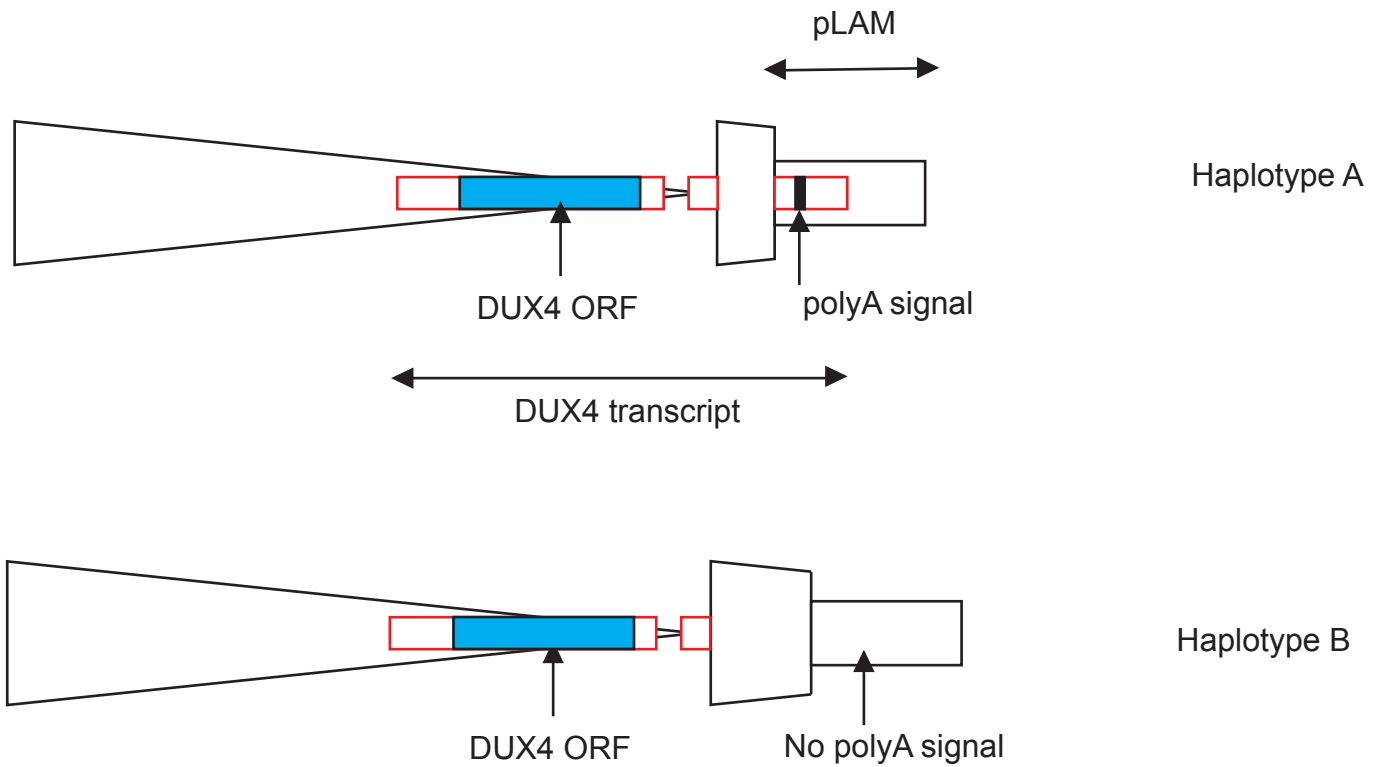

# Supplemental figure 2

a

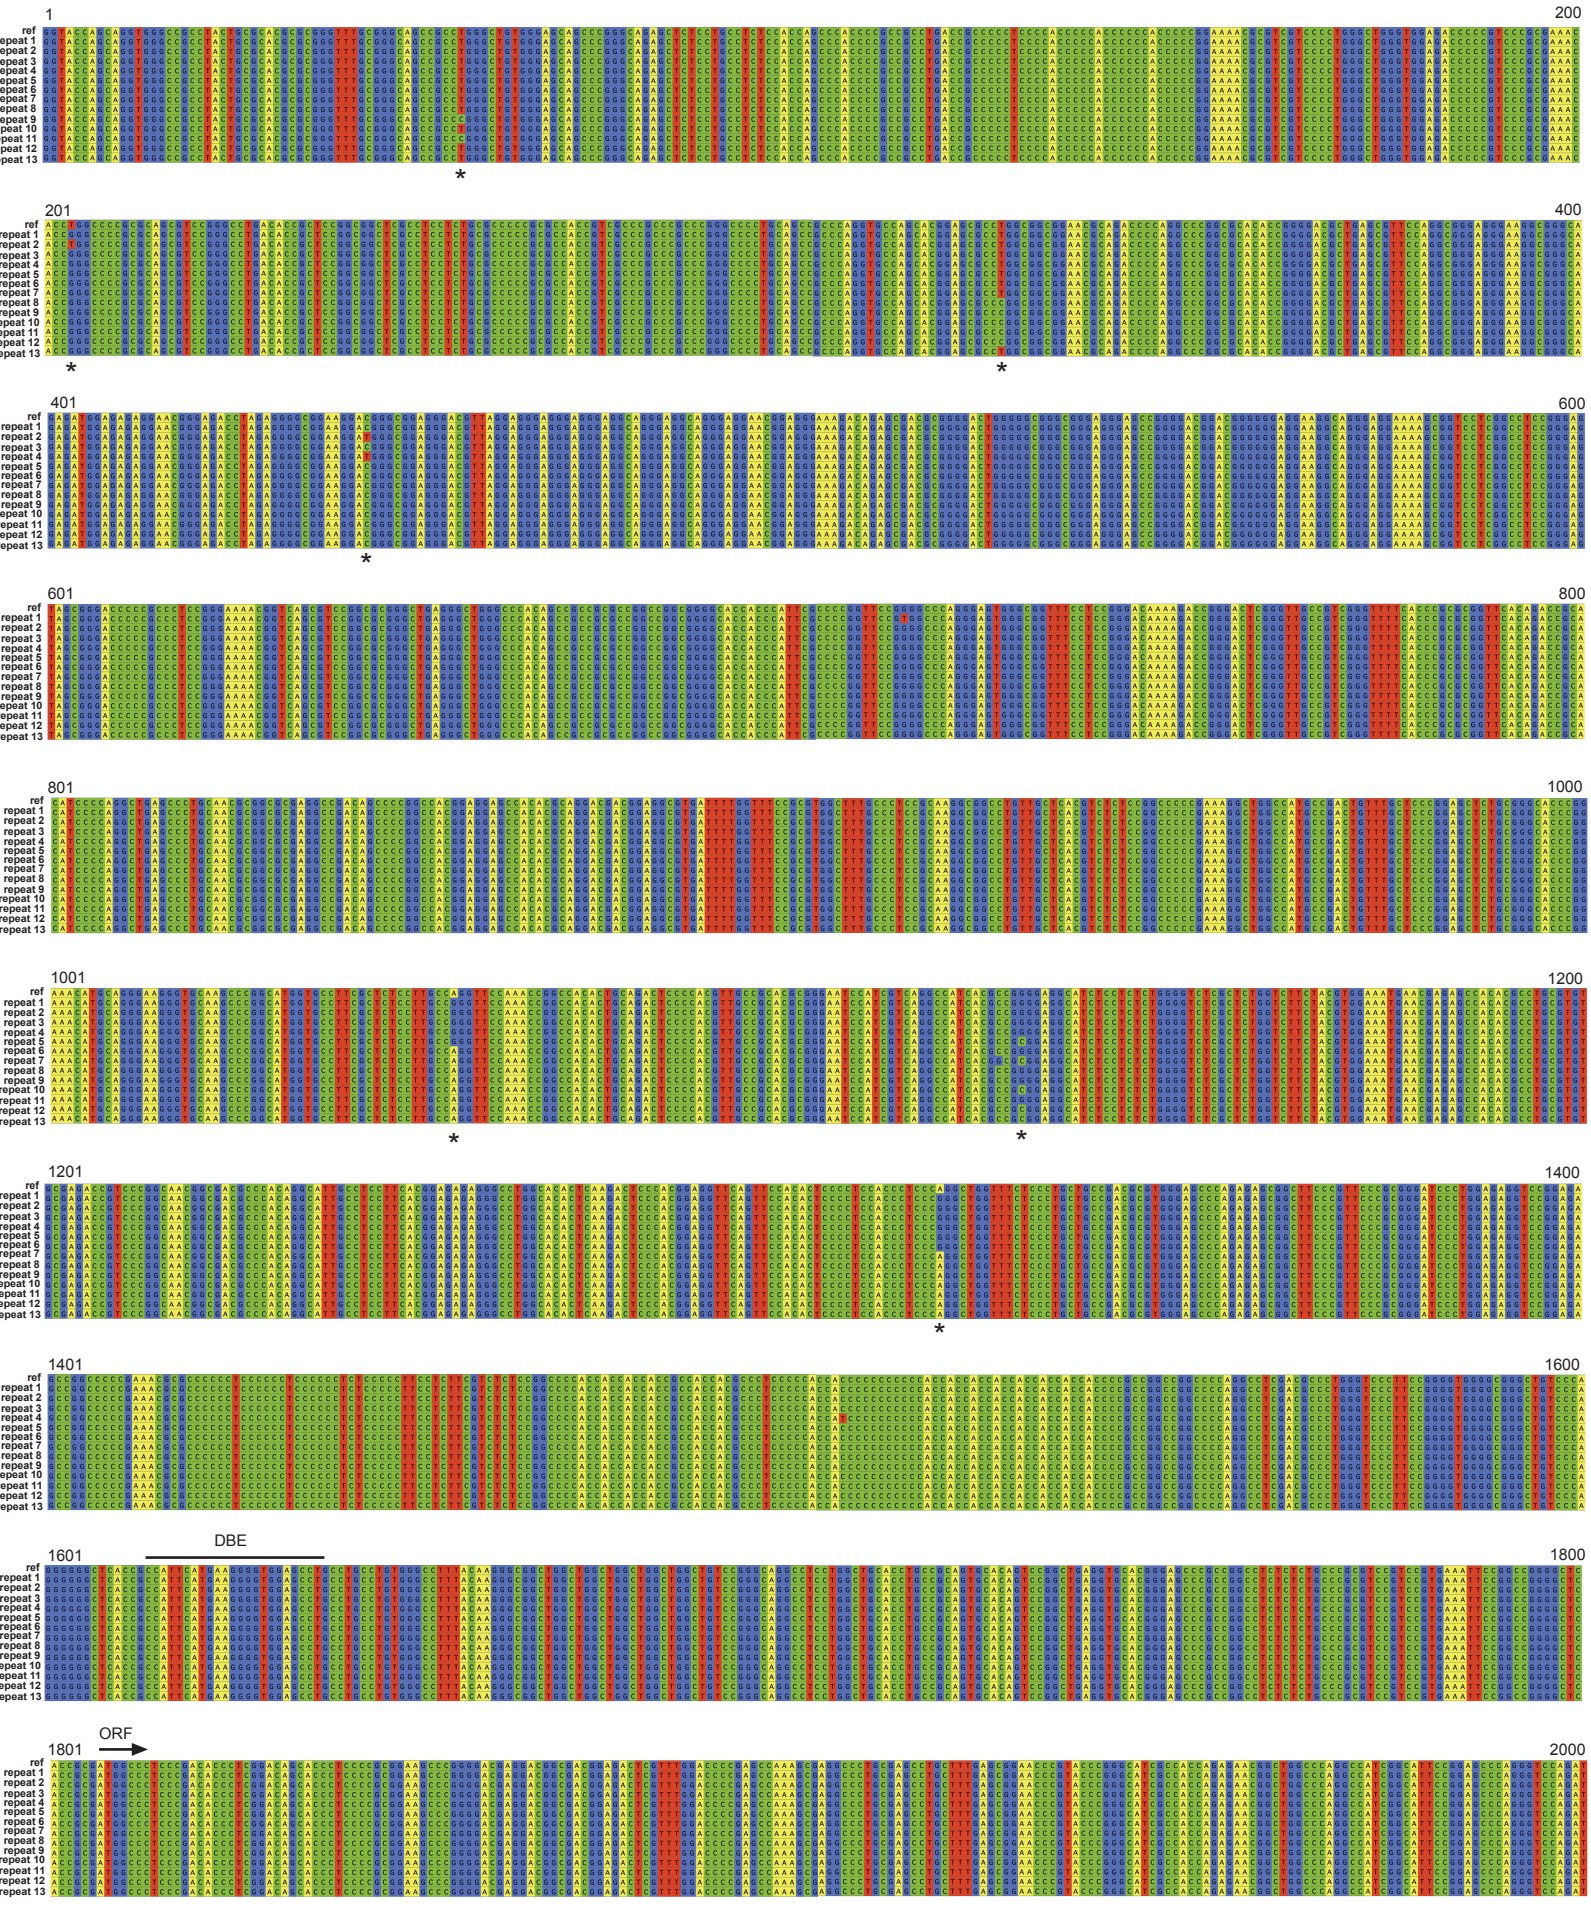

2001

2200

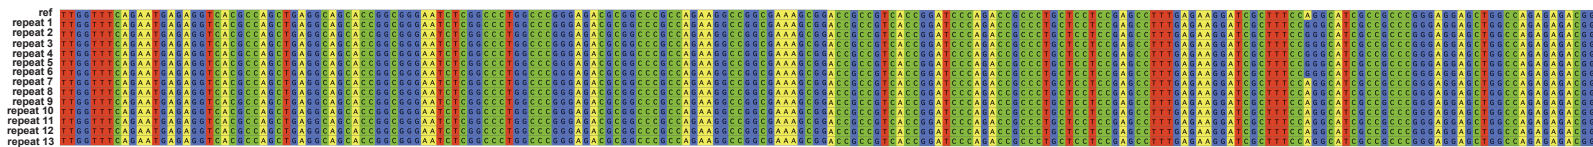

2201

2400

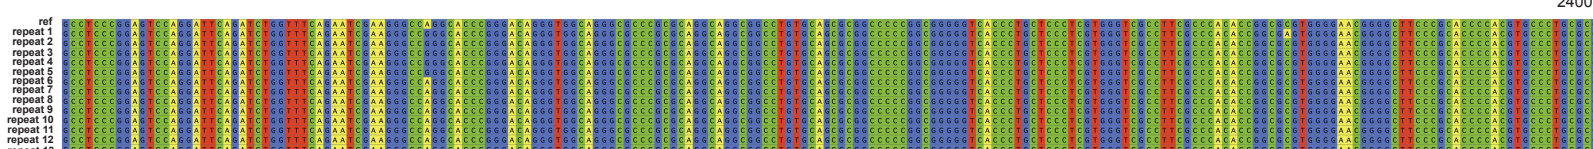

2401

2600

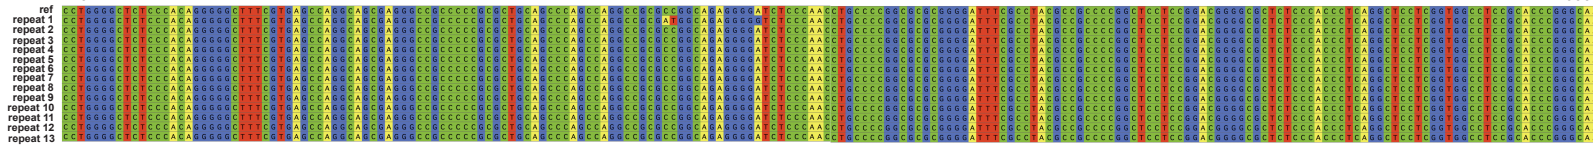

2601

2800

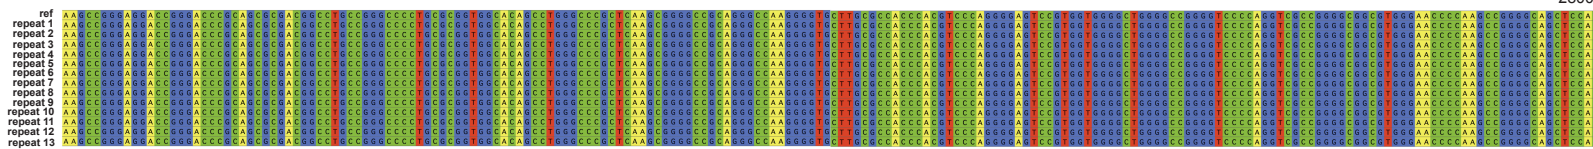

2801

3000

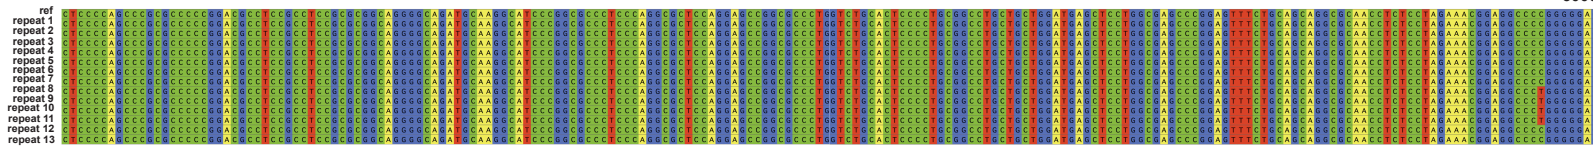

3001

3200

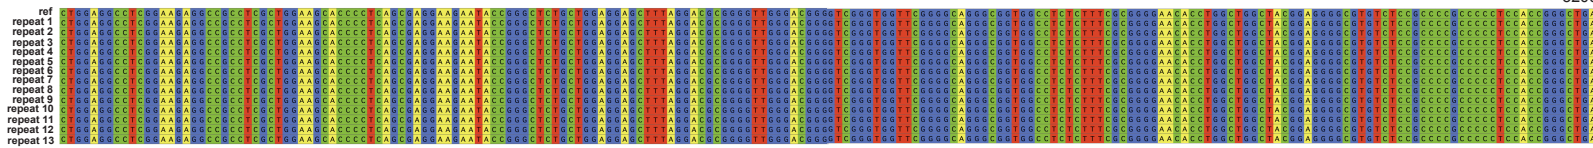

3201

3306

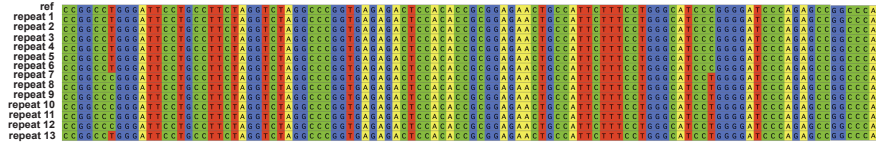

b

|     |   | MinION |    |    |    |
|-----|---|--------|----|----|----|
|     |   | A      | C  | G  | T  |
| ref | A |        | 0  | 25 | 0  |
|     | C | 0      |    | 13 | 13 |
|     | G | 0      | 1  |    | 5  |
|     | T | 2      | 15 | 1  |    |



# Supplemental Figure 4

read3

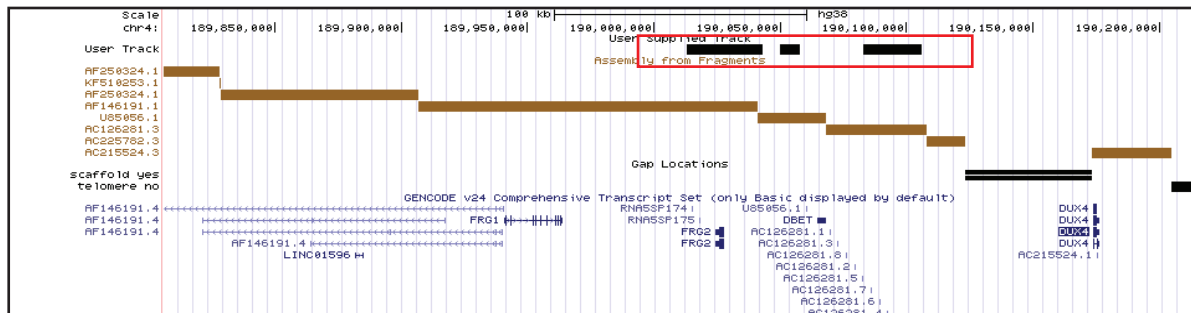

read4

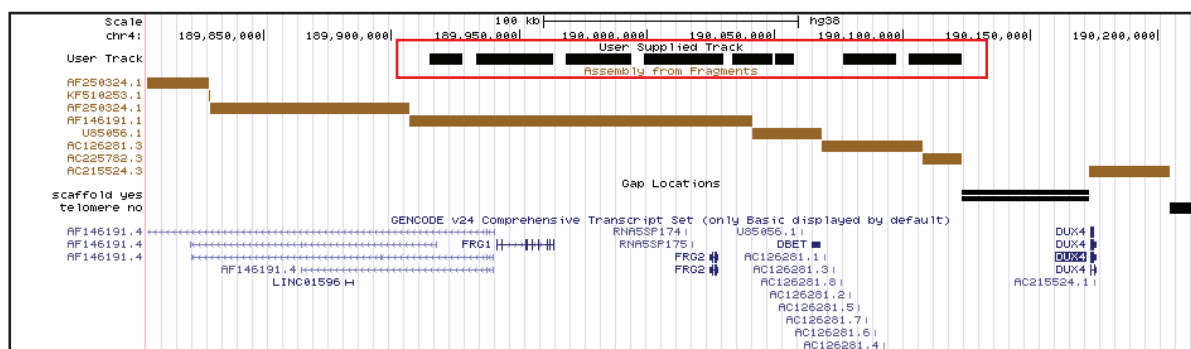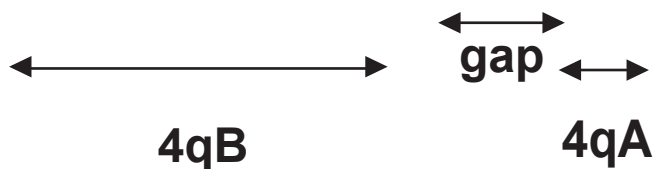

# Supplemental Figure 5

a

## The last D4Z4 - 4qB read3

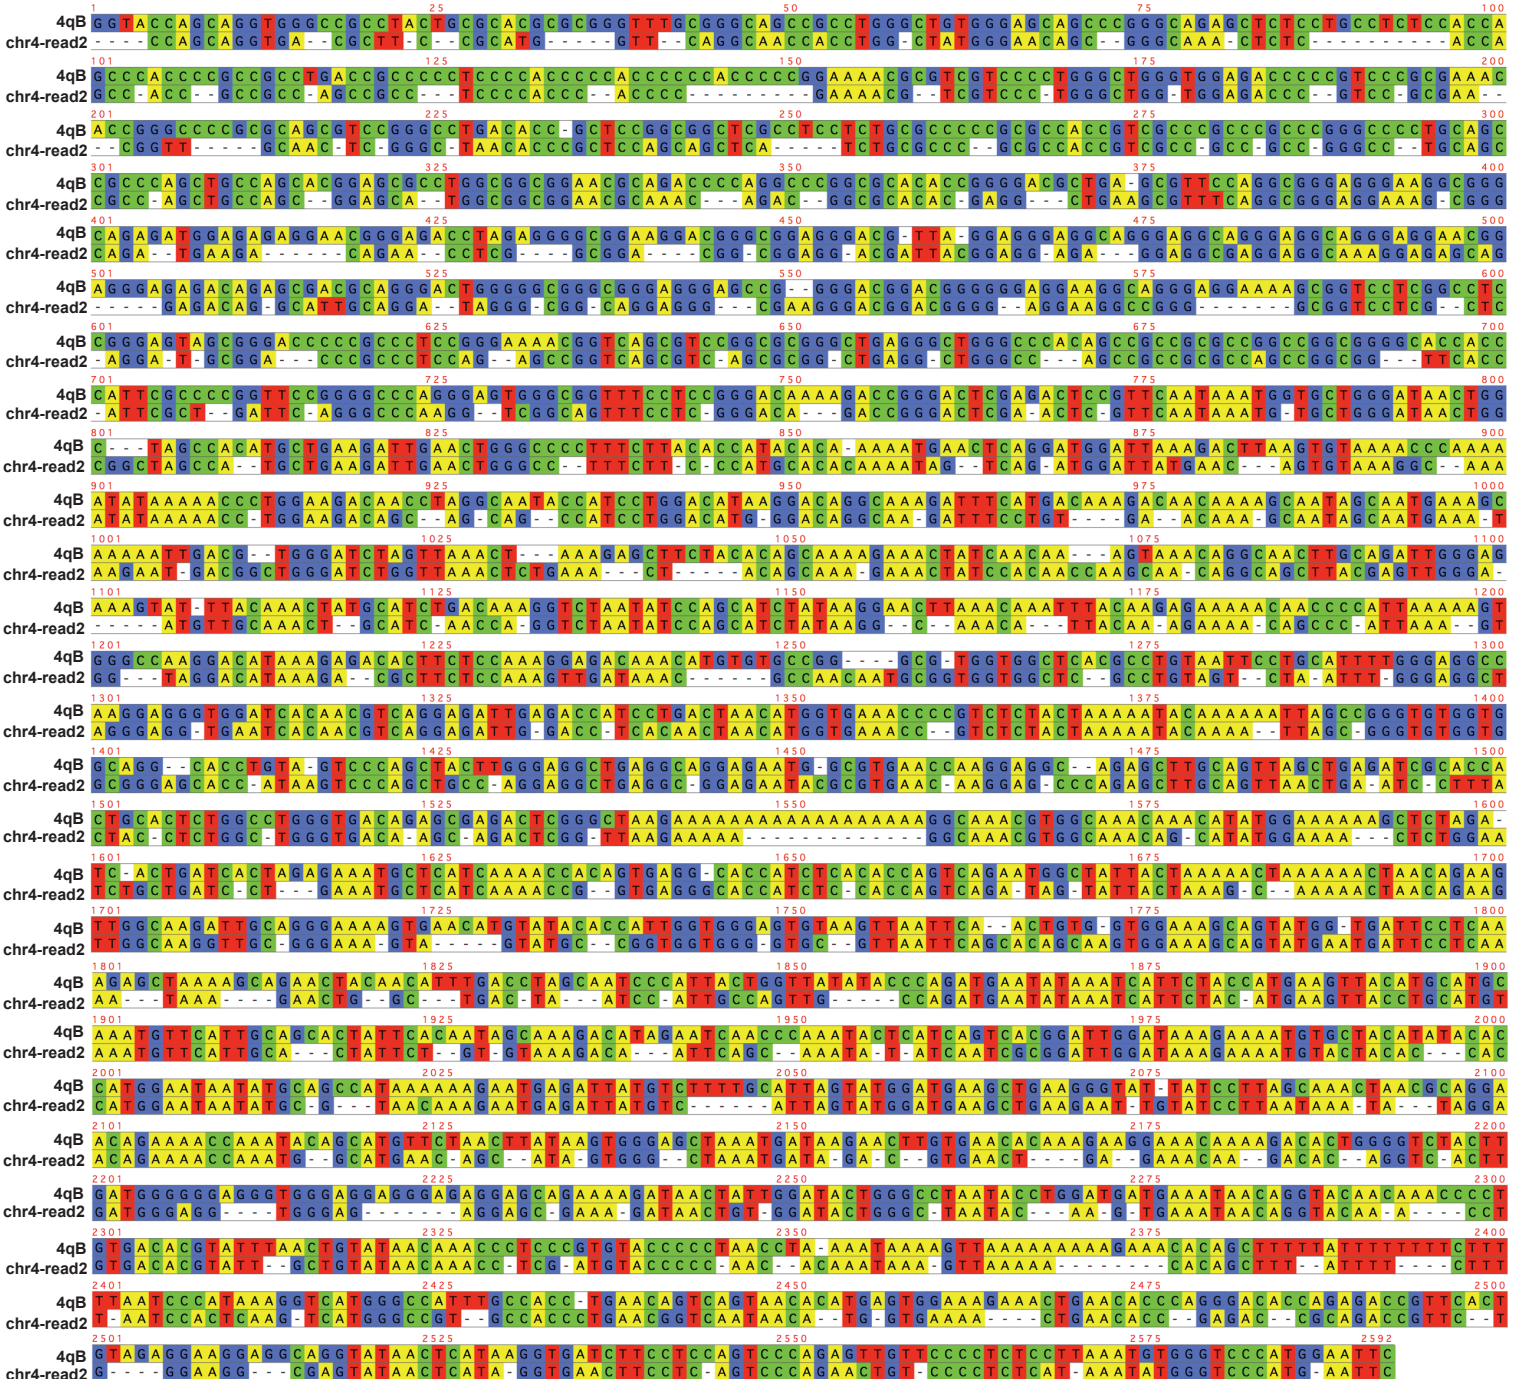

*EcoRI*



**b**

# The last D4Z4 - 4qB read4

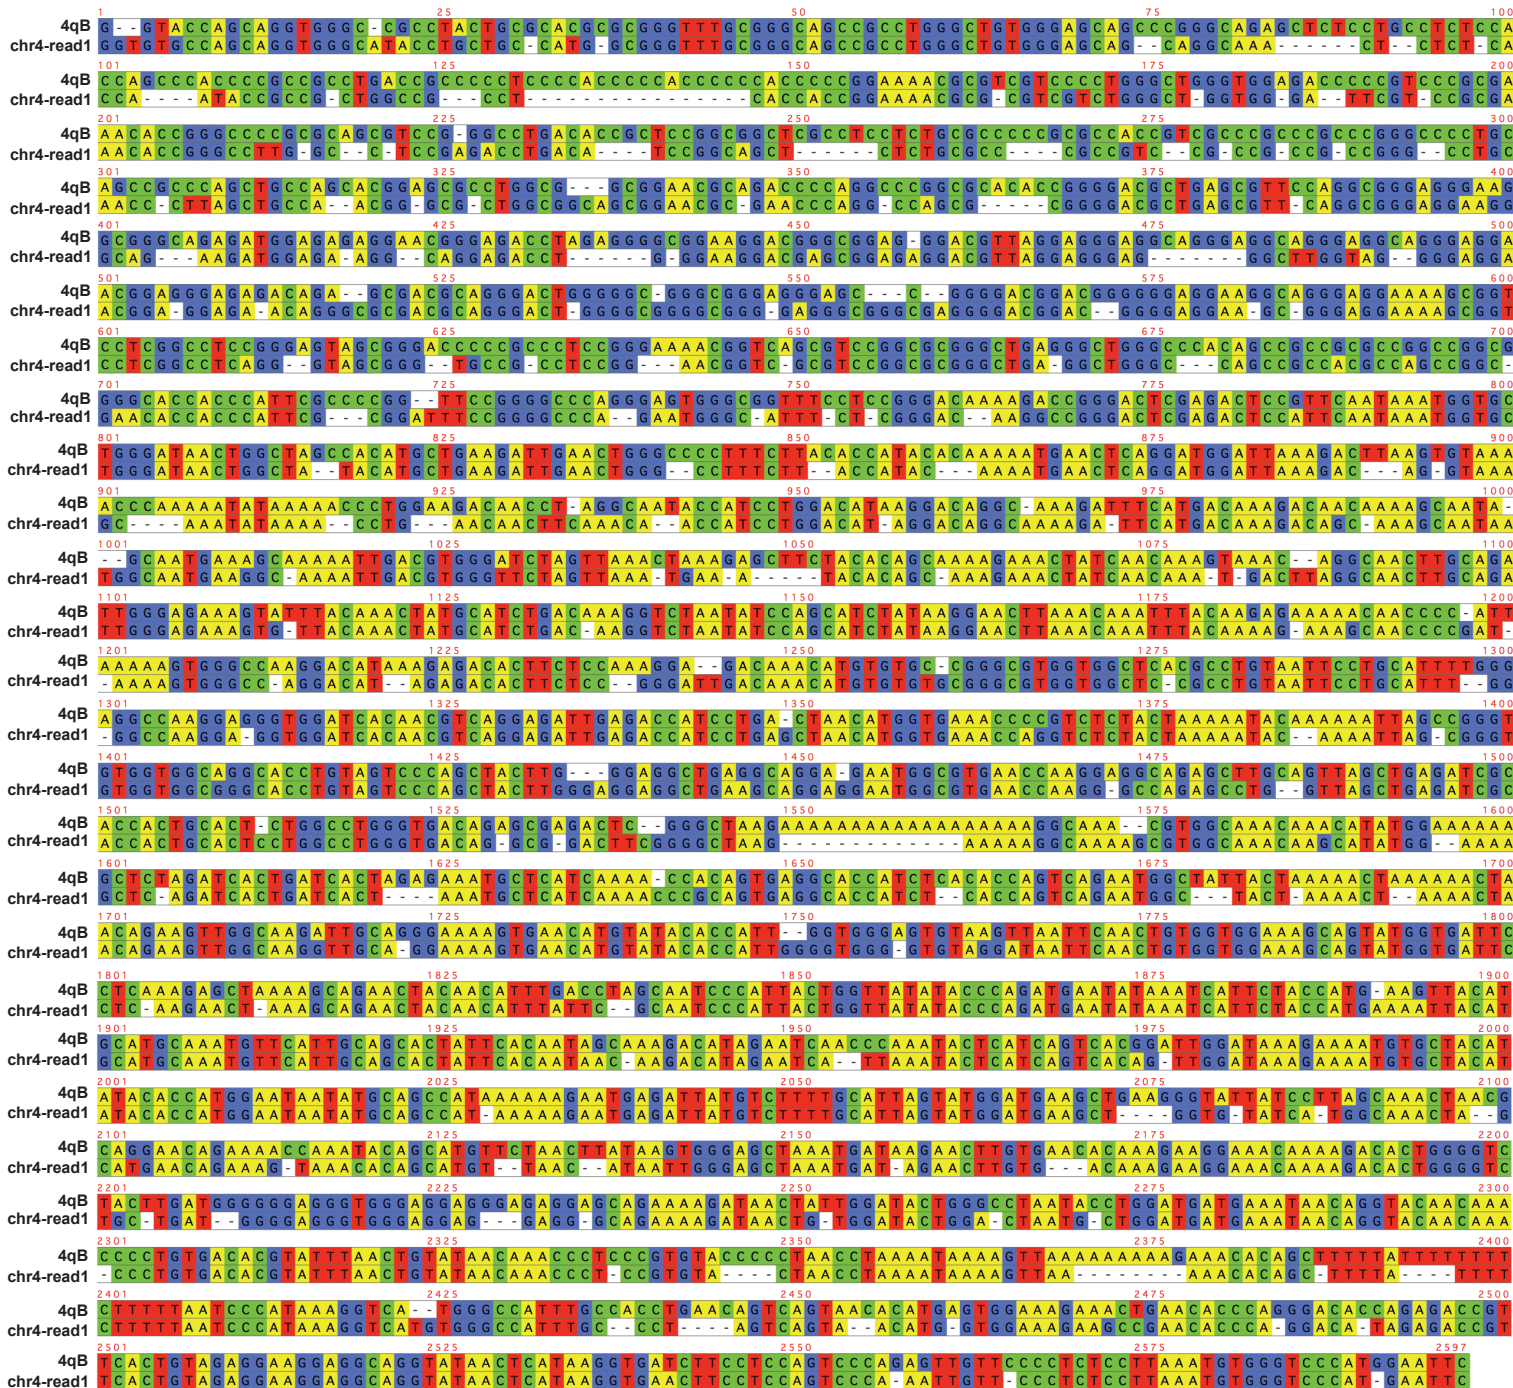

*EcoRI*

| Statistics          |             |
|---------------------|-------------|
| Number of reads     | 128,171     |
| Total bases         | 971,130,587 |
| Average read length | 7,577       |

Supplemental Table 1. Statistics of the MinION sequencing

Supplemental Table 1.

We obtained 128,171 reads from the single MinION run using the R9.4 flow-cell.

|       | Number of base | (%)  |
|-------|----------------|------|
| A     | 7907           | 15.9 |
| T     | 7295           | 14.6 |
| C     | 18074          | 36.2 |
| G     | 16601          | 33.3 |
| total | 49877          |      |

Supplemental Table 2. Composition of the sequenced D4Z4 fragment

Supplemental Table 2.

Summary of the base content of the sequenced region. The D4Z4 array is a

GC-rich sequence.

| Read ID | Length of the read                                        | Position of the first repeat starts | Position of the last repeat ends | Length of the D4Z4 repeats | Read mapped to | # of repeat estimated from single D4Z4 alignment |    |
|---------|-----------------------------------------------------------|-------------------------------------|----------------------------------|----------------------------|----------------|--------------------------------------------------|----|
| read1   | 779f5ab0-c45c-4c80-9950-8848b24d70a4_Basecall_1D_template | 93,975                              | 13,956                           | 67,645                     | 53,689         | chr10                                            | 20 |
| read2   | 05e99c44-b96e-4ebe-a83c-f3eed6c27a39_Basecall_1D_template | 158,136                             | 68,858                           | 123,650                    | 54,792         | chr10                                            | 20 |
| read3   | 915c2d77-8227-4803-957c-a3c8d3ee4981_Basecall_1D_template | 97,106                              | 42,093                           | 85,838                     | 43,745         | chr4                                             | 17 |
| read4   | 457c6e90-cc88-48d4-91ec-f3fabbf321ec_Basecall_1D_template | 201,153                             | 127,619                          | 174,409                    | 46,790         | chr4                                             | 17 |

Supplemental Table 3. Statistics of the 4 reads containing chr4 and chr10 D4Z4.

### Supplemental Table 3.

From the rel4 dataset, we obtained 4 reads mapped to chr4 and chr10 that contain the whole D4Z4 array. The statistics of the reads are described. The original read ID are also shown.

## Figure legend

### Supplemental Figure 1

The scheme shows haplotype 4qA and 4qB. There is no homology between the pLAM regions and 4qB. 4qB lacks polyA signaling thus considered to be benign.

### Supplemental Figure 2

(a) Alignment of the nanopore-derived consensus sequence to the 13 D4Z4 repeats reference (CT476828.7). Asterisks show the recurrent errors across the repeats. DBE: D4Z4-binding element. The upper lane “ref” shows the single reference D4Z4 sequence. Note that CT476828.7 contains completely identical D4Z4 sequence in each repeat. (b) In total, 75 bases were different from the whole D4Z4 reference sequence. Errors between purines or between pyrimidines are highlighted blue.

### Supplemental Figure 3

Comparison of the reference, Sanger sequencing, and nanopore sequencing results of the DUX4 ORF in the last D4Z4 repeat. These sequences are completely matched.

#### Supplemental Figure 4

The alignment of the two reads obtained by whole human genome nanopore sequencing to the human reference GRCh38. Two reads are viewed using UCSC genome browser and marked by red-circles. Note that there is a false gap between the D4Z4 array with 4qB haplotype and the last D4Z4 repeat with 4qA haplotype sequence. The reads are only aligned to the 4qB region.

#### Supplemental Figure 5

The 2 reads mapped to chr4 are aligned to the reference sequence with D4Z4 repeat with 4qB haplotype (AC225782.3). The last D4Z4 is shown. The upper sequence is the reference and the lower sequence is the sequence from 2 reads, read3 (a) and read4 (b).
